# Supplementary material for: Preparation of a modified g-C3N4catalyst library and realization of a two-dimensional screening reaction
Source: Royal Society of Chemistry journal article supplement (doi:10.1039/d0nj05141a), 2020-12-21
Supplement: d0nj05141a1.pdf [file d0nj05141a1.pdf]

Electronic Supplementary Material (ESI) for New Journal of Chemistry.

## Support Information

### Preparation of modified g-C<sub>3</sub>N<sub>4</sub> Catalyst Library and realization of two-dimensional screening reaction

*Fenli Liu<sup>1</sup>, Sifan Bi<sup>1</sup>, Wenjing Wang<sup>1</sup>, Qiannan Duan<sup>2</sup>, Yunjin Feng<sup>1</sup>, Jiayuan Chen<sup>1</sup>,  
Run Luo<sup>1</sup>, Yicai Huang, Jianchao Lee<sup>1,\*</sup>*

*<sup>1</sup> Lab of Env-Mat, Department of Environmental Science, Shaanxi Normal University,  
Xi'an 710062, China*

*To whom correspondence can be addressed :E-mail: [jianchaolee@snnu.edu.cn](mailto:jianchaolee@snnu.edu.cn)*

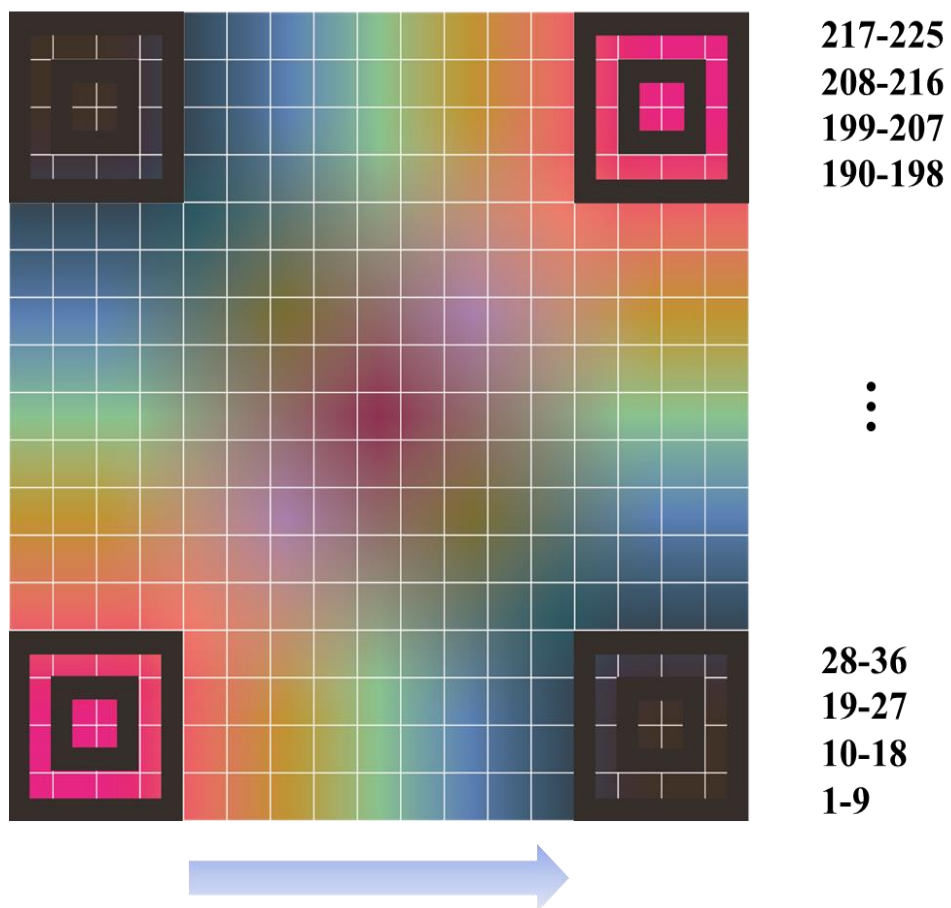

**Figure S1.** Schematic diagram of 225 reaction units of number.

**Table S1.** The CMY values and components of catalysts in all reaction units

| No. | CMY values(%) |      |      | R <sub>atom</sub> |      |      |
|-----|---------------|------|------|-------------------|------|------|
|     | C             | M    | Y    | Cd                | Cu   | Ni   |
| 1   | 3.4           | 71.0 | 56.2 | 0.03              | 0.54 | 0.43 |
| 2   | 13.6          | 53.2 | 80.0 | 0.09              | 0.36 | 0.55 |
| 3   | 25.8          | 35.0 | 94.6 | 0.17              | 0.22 | 0.61 |
| 4   | 38.0          | 16.8 | 74.1 | 0.30              | 0.13 | 0.57 |
| 5   | 50.0          | 3.7  | 50.0 | 0.48              | 0.04 | 0.48 |
| 6   | 62.1          | 16.8 | 25.9 | 0.59              | 0.16 | 0.25 |
| 7   | 74.2          | 35.0 | 5.4  | 0.65              | 0.30 | 0.05 |
| 8   | 86.5          | 53.2 | 20.0 | 0.54              | 0.33 | 0.13 |
| 9   | 96.6          | 71.0 | 43.8 | 0.46              | 0.33 | 0.21 |
| 10  | 3.4           | 71.0 | 56.2 | 0.03              | 0.54 | 0.43 |
| 11  | 13.6          | 53.2 | 80.0 | 0.09              | 0.36 | 0.55 |
| 12  | 25.8          | 35.0 | 94.6 | 0.16              | 0.23 | 0.61 |
| 13  | 38.0          | 16.8 | 74.1 | 0.30              | 0.13 | 0.57 |
| 14  | 50.0          | 3.7  | 50.0 | 0.48              | 0.04 | 0.48 |
| 15  | 62.1          | 16.8 | 25.9 | 0.59              | 0.16 | 0.25 |
| 16  | 74.2          | 35.0 | 5.42 | 0.65              | 0.30 | 0.05 |
| 17  | 86.5          | 53.2 | 20.0 | 0.54              | 0.33 | 0.13 |
| 18  | 96.6          | 71.0 | 43.8 | 0.46              | 0.33 | 0.21 |
| 19  | 3.4           | 70.9 | 55.1 | 0.02              | 0.55 | 0.43 |
| 20  | 13.6          | 53.2 | 74.7 | 0.10              | 0.37 | 0.53 |
| 21  | 25.8          | 35.1 | 86.9 | 0.17              | 0.24 | 0.59 |
| 22  | 38.0          | 16.9 | 69.8 | 0.30              | 0.14 | 0.56 |
| 23  | 50.0          | 3.8  | 50.0 | 0.48              | 0.04 | 0.48 |
| 24  | 62.1          | 16.9 | 30.2 | 0.57              | 0.15 | 0.28 |
| 25  | 74.2          | 35.1 | 13.0 | 0.61              | 0.28 | 0.11 |
| 26  | 86.5          | 53.2 | 25.3 | 0.52              | 0.32 | 0.16 |
| 27  | 96.6          | 70.9 | 44.9 | 0.46              | 0.33 | 0.21 |
| 28  | 3.4           | 66.1 | 52.1 | 0.03              | 0.54 | 0.43 |
| 29  | 13.6          | 52.4 | 60.5 | 0.11              | 0.41 | 0.48 |
| 30  | 25.8          | 38.6 | 65.9 | 0.20              | 0.29 | 0.51 |
| 31  | 38.0          | 24.6 | 58.5 | 0.31              | 0.20 | 0.49 |
| 32  | 50.0          | 14.1 | 50.0 | 0.44              | 0.12 | 0.44 |
| 33  | 62.1          | 24.6 | 41.5 | 0.48              | 0.19 | 0.33 |
| 34  | 74.2          | 38.6 | 34.1 | 0.51              | 0.26 | 0.23 |
| 35  | 86.5          | 52.4 | 39.5 | 0.49              | 0.29 | 0.22 |
| 36  | 96.6          | 66.1 | 47.9 | 0.46              | 0.31 | 0.23 |
| 37  | 3.4           | 71.0 | 56.2 | 0.03              | 0.54 | 0.43 |
| 38  | 3.4           | 71.0 | 56.2 | 0.03              | 0.54 | 0.43 |

---

|    |      |      |      |      |      |      |
|----|------|------|------|------|------|------|
| 39 | 3.4  | 70.9 | 55.1 | 0.02 | 0.55 | 0.43 |
| 40 | 3.4  | 66.1 | 52.2 | 0.03 | 0.54 | 0.43 |
| 41 | 25.8 | 35.1 | 87.0 | 0.17 | 0.24 | 0.59 |
| 42 | 15.9 | 51.3 | 46.4 | 0.14 | 0.45 | 0.41 |
| 43 | 27.3 | 43.9 | 44.5 | 0.24 | 0.38 | 0.38 |
| 44 | 38.7 | 36.4 | 47.1 | 0.32 | 0.30 | 0.38 |
| 45 | 50.0 | 30.8 | 50.0 | 0.38 | 0.24 | 0.38 |
| 46 | 61.3 | 36.4 | 52.9 | 0.41 | 0.24 | 0.35 |
| 47 | 72.7 | 43.9 | 55.5 | 0.42 | 0.26 | 0.32 |
| 48 | 84.1 | 51.3 | 53.6 | 0.45 | 0.27 | 0.28 |
| 49 | 94.3 | 58.6 | 50.7 | 0.46 | 0.29 | 0.25 |
| 50 | 96.6 | 66.1 | 47.9 | 0.46 | 0.31 | 0.23 |
| 51 | 96.6 | 70.9 | 44.9 | 0.46 | 0.33 | 0.21 |
| 52 | 96.6 | 71.0 | 43.8 | 0.46 | 0.33 | 0.21 |
| 53 | 96.6 | 71.0 | 43.8 | 0.46 | 0.33 | 0.21 |
| 54 | 13.6 | 53.2 | 80.0 | 0.09 | 0.36 | 0.55 |
| 55 | 13.6 | 53.2 | 80.0 | 0.09 | 0.36 | 0.55 |
| 56 | 13.6 | 53.2 | 74.7 | 0.10 | 0.37 | 0.53 |
| 57 | 13.6 | 52.5 | 60.5 | 0.11 | 0.41 | 0.48 |
| 58 | 15.9 | 51.3 | 46.4 | 0.14 | 0.45 | 0.41 |
| 59 | 24.3 | 50.2 | 32.5 | 0.23 | 0.47 | 0.30 |
| 60 | 32.9 | 49.1 | 23.6 | 0.31 | 0.47 | 0.22 |
| 61 | 41.5 | 47.9 | 35.9 | 0.33 | 0.38 | 0.29 |
| 62 | 50.0 | 47.0 | 50.0 | 0.34 | 0.32 | 0.34 |
| 63 | 58.6 | 47.9 | 64.1 | 0.34 | 0.28 | 0.38 |
| 64 | 67.1 | 49.1 | 76.4 | 0.35 | 0.25 | 0.40 |
| 65 | 75.8 | 50.2 | 67.5 | 0.39 | 0.26 | 0.35 |
| 66 | 84.1 | 51.3 | 53.6 | 0.45 | 0.27 | 0.28 |
| 67 | 86.5 | 52.5 | 39.5 | 0.49 | 0.29 | 0.22 |
| 68 | 86.5 | 53.2 | 25.3 | 0.52 | 0.32 | 0.15 |
| 69 | 86.5 | 53.2 | 20.0 | 0.54 | 0.33 | 0.12 |
| 70 | 86.5 | 53.2 | 20.0 | 0.54 | 0.33 | 0.12 |
| 71 | 25.8 | 35.0 | 94.6 | 0.16 | 0.23 | 0.61 |
| 72 | 25.8 | 35.0 | 94.6 | 0.16 | 0.23 | 0.61 |
| 73 | 5.72 | 58.6 | 49.3 | 0.05 | 0.52 | 0.43 |
| 74 | 25.8 | 38.5 | 65.8 | 0.20 | 0.29 | 0.51 |
| 75 | 27.3 | 43.9 | 44.6 | 0.24 | 0.38 | 0.38 |
| 76 | 32.8 | 49.1 | 23.7 | 0.31 | 0.47 | 0.22 |
| 77 | 38.5 | 54.3 | 10.4 | 0.37 | 0.53 | 0.10 |
| 78 | 44.4 | 59.7 | 28.9 | 0.33 | 0.45 | 0.22 |
| 79 | 50.0 | 63.7 | 50.0 | 0.30 | 0.39 | 0.31 |
| 80 | 55.7 | 59.7 | 71.2 | 0.30 | 0.32 | 0.38 |
| 81 | 61.5 | 54.3 | 89.6 | 0.30 | 0.26 | 0.44 |
| 82 | 67.2 | 49.1 | 76.3 | 0.35 | 0.25 | 0.40 |

---

---

|     |      |      |      |      |      |      |
|-----|------|------|------|------|------|------|
| 83  | 72.7 | 43.9 | 55.4 | 0.42 | 0.26 | 0.32 |
| 84  | 74.2 | 38.5 | 34.2 | 0.51 | 0.26 | 0.23 |
| 85  | 74.2 | 35.1 | 13.1 | 0.61 | 0.28 | 0.11 |
| 86  | 74.2 | 35.0 | 5.4  | 0.65 | 0.30 | 0.05 |
| 87  | 74.2 | 35.0 | 5.4  | 0.65 | 0.30 | 0.05 |
| 88  | 38.0 | 16.8 | 74.1 | 0.30 | 0.13 | 0.57 |
| 89  | 38.0 | 16.8 | 74.1 | 0.30 | 0.13 | 0.57 |
| 90  | 38.0 | 16.9 | 69.9 | 0.30 | 0.14 | 0.56 |
| 91  | 38.0 | 24.6 | 58.5 | 0.32 | 0.20 | 0.48 |
| 92  | 38.6 | 36.4 | 47.1 | 0.32 | 0.30 | 0.38 |
| 93  | 41.5 | 48.0 | 35.9 | 0.33 | 0.38 | 0.29 |
| 94  | 44.3 | 59.7 | 28.8 | 0.33 | 0.45 | 0.21 |
| 95  | 47.2 | 71.5 | 38.7 | 0.30 | 0.45 | 0.25 |
| 96  | 50.0 | 80.3 | 50.0 | 0.28 | 0.44 | 0.28 |
| 97  | 52.8 | 71.5 | 61.4 | 0.28 | 0.39 | 0.33 |
| 98  | 55.7 | 59.7 | 71.2 | 0.30 | 0.32 | 0.38 |
| 99  | 58.6 | 48.0 | 64.1 | 0.34 | 0.28 | 0.38 |
| 100 | 61.4 | 36.4 | 52.9 | 0.41 | 0.24 | 0.35 |
| 101 | 62.1 | 24.6 | 41.6 | 0.49 | 0.19 | 0.32 |
| 102 | 62.1 | 16.9 | 30.1 | 0.57 | 0.15 | 0.28 |
| 103 | 62.1 | 16.8 | 25.9 | 0.59 | 0.16 | 0.25 |
| 104 | 62.1 | 16.8 | 25.9 | 0.59 | 0.16 | 0.25 |
| 105 | 50.0 | 3.7  | 50.0 | 0.48 | 0.04 | 0.48 |
| 106 | 49.9 | 3.7  | 50.0 | 0.48 | 0.04 | 0.48 |
| 107 | 50.0 | 3.8  | 50.0 | 0.48 | 0.04 | 0.48 |
| 108 | 50.0 | 14.2 | 50.0 | 0.44 | 0.12 | 0.44 |
| 109 | 38.5 | 54.3 | 10.4 | 0.37 | 0.53 | 0.10 |
| 110 | 50.0 | 47.1 | 50.0 | 0.34 | 0.32 | 0.34 |
| 111 | 50.0 | 63.6 | 49.9 | 0.31 | 0.39 | 0.30 |
| 112 | 50.0 | 80.3 | 50.0 | 0.28 | 0.44 | 0.28 |
| 113 | 50.0 | 92.6 | 50.0 | 0.26 | 0.48 | 0.26 |
| 114 | 50.0 | 80.3 | 50.0 | 0.28 | 0.44 | 0.28 |
| 115 | 50.0 | 63.6 | 50.0 | 0.31 | 0.39 | 0.30 |
| 116 | 50.0 | 47.1 | 50.0 | 0.34 | 0.32 | 0.34 |
| 117 | 50.0 | 30.9 | 50.0 | 0.38 | 0.24 | 0.38 |
| 118 | 50.0 | 14.2 | 50.0 | 0.44 | 0.12 | 0.44 |
| 119 | 50.0 | 3.8  | 50.0 | 0.48 | 0.04 | 0.48 |
| 120 | 50.0 | 3.7  | 50.0 | 0.48 | 0.04 | 0.48 |
| 121 | 50.0 | 3.7  | 50.0 | 0.48 | 0.04 | 0.48 |
| 122 | 62.1 | 16.8 | 25.9 | 0.59 | 0.16 | 0.25 |
| 123 | 62.1 | 16.8 | 25.9 | 0.59 | 0.16 | 0.25 |
| 124 | 62.1 | 16.9 | 30.1 | 0.57 | 0.15 | 0.28 |
| 125 | 62.1 | 24.6 | 41.6 | 0.48 | 0.19 | 0.33 |
| 126 | 61.4 | 36.4 | 52.9 | 0.41 | 0.24 | 0.35 |

---

---

|     |      |      |      |      |      |      |
|-----|------|------|------|------|------|------|
| 127 | 58.6 | 48.0 | 64.1 | 0.34 | 0.28 | 0.38 |
| 128 | 55.7 | 59.7 | 71.2 | 0.30 | 0.32 | 0.38 |
| 129 | 52.8 | 71.5 | 61.4 | 0.28 | 0.39 | 0.33 |
| 130 | 50.0 | 80.3 | 50.0 | 0.28 | 0.45 | 0.27 |
| 131 | 47.3 | 71.5 | 38.7 | 0.30 | 0.45 | 0.25 |
| 132 | 44.3 | 59.7 | 28.8 | 0.33 | 0.45 | 0.22 |
| 133 | 41.4 | 48.0 | 35.9 | 0.33 | 0.38 | 0.29 |
| 134 | 38.6 | 36.4 | 47.1 | 0.32 | 0.30 | 0.38 |
| 135 | 38.0 | 24.6 | 58.5 | 0.31 | 0.20 | 0.49 |
| 136 | 38.0 | 16.9 | 69.9 | 0.30 | 0.14 | 0.56 |
| 137 | 38.0 | 16.8 | 74.1 | 0.30 | 0.13 | 0.57 |
| 138 | 38.0 | 16.8 | 74.1 | 0.29 | 0.13 | 0.58 |
| 139 | 74.2 | 35.0 | 5.4  | 0.65 | 0.31 | 0.04 |
| 140 | 74.2 | 35.0 | 5.4  | 0.64 | 0.31 | 0.05 |
| 141 | 74.2 | 35.1 | 13.1 | 0.61 | 0.28 | 0.11 |
| 142 | 74.2 | 38.5 | 34.2 | 0.51 | 0.26 | 0.23 |
| 143 | 72.7 | 43.9 | 55.4 | 0.42 | 0.26 | 0.32 |
| 144 | 67.2 | 49.1 | 76.3 | 0.35 | 0.25 | 0.40 |
| 145 | 50.0 | 92.6 | 50.0 | 0.26 | 0.48 | 0.26 |
| 146 | 55.7 | 59.7 | 71.2 | 0.30 | 0.32 | 0.38 |
| 147 | 50.0 | 63.7 | 50.0 | 0.30 | 0.40 | 0.30 |
| 148 | 44.4 | 59.7 | 28.9 | 0.33 | 0.45 | 0.22 |
| 149 | 38.5 | 54.3 | 10.4 | 0.37 | 0.53 | 0.10 |
| 150 | 32.8 | 49.1 | 23.7 | 0.31 | 0.47 | 0.22 |
| 151 | 27.3 | 43.9 | 44.6 | 0.24 | 0.38 | 0.38 |
| 152 | 25.8 | 38.5 | 65.8 | 0.20 | 0.30 | 0.50 |
| 153 | 50.0 | 3.72 | 50.0 | 0.48 | 0.04 | 0.48 |
| 154 | 25.8 | 35.0 | 94.6 | 0.16 | 0.23 | 0.61 |
| 155 | 25.8 | 35.0 | 94.6 | 0.17 | 0.22 | 0.61 |
| 156 | 86.5 | 53.2 | 20.0 | 0.54 | 0.33 | 0.13 |
| 157 | 86.5 | 53.2 | 20.0 | 0.55 | 0.32 | 0.12 |
| 158 | 86.5 | 53.2 | 25.3 | 0.52 | 0.33 | 0.15 |
| 159 | 86.5 | 52.5 | 39.5 | 0.49 | 0.29 | 0.22 |
| 160 | 84.1 | 51.3 | 53.6 | 0.45 | 0.27 | 0.28 |
| 161 | 75.8 | 50.2 | 67.5 | 0.39 | 0.26 | 0.35 |
| 162 | 67.1 | 49.1 | 76.4 | 0.35 | 0.25 | 0.40 |
| 163 | 58.6 | 47.9 | 64.1 | 0.34 | 0.28 | 0.38 |
| 164 | 50.0 | 47.0 | 50.0 | 0.34 | 0.32 | 0.34 |
| 165 | 41.5 | 47.9 | 35.9 | 0.33 | 0.38 | 0.29 |
| 166 | 32.9 | 49.1 | 23.6 | 0.31 | 0.47 | 0.22 |
| 167 | 24.3 | 50.2 | 32.5 | 0.23 | 0.47 | 0.30 |
| 168 | 15.9 | 51.3 | 46.4 | 0.14 | 0.45 | 0.41 |
| 169 | 13.6 | 52.5 | 60.5 | 0.10 | 0.42 | 0.48 |
| 170 | 13.6 | 53.2 | 74.7 | 0.10 | 0.37 | 0.53 |

---

---

|     |      |      |      |      |      |      |
|-----|------|------|------|------|------|------|
| 171 | 13.6 | 53.2 | 80.0 | 0.09 | 0.36 | 0.55 |
| 172 | 13.6 | 53.2 | 80.0 | 0.09 | 0.36 | 0.55 |
| 173 | 96.6 | 71.0 | 43.8 | 0.45 | 0.34 | 0.21 |
| 174 | 96.6 | 71.0 | 43.8 | 0.46 | 0.34 | 0.20 |
| 175 | 96.6 | 70.9 | 44.9 | 0.46 | 0.33 | 0.21 |
| 176 | 96.6 | 66.1 | 47.9 | 0.46 | 0.31 | 0.23 |
| 177 | 94.3 | 58.6 | 50.7 | 0.46 | 0.29 | 0.25 |
| 178 | 84.1 | 51.3 | 53.6 | 0.45 | 0.27 | 0.28 |
| 179 | 49.9 | 63.8 | 50.0 | 0.30 | 0.39 | 0.31 |
| 180 | 61.3 | 36.4 | 52.9 | 0.41 | 0.24 | 0.35 |
| 181 | 50.0 | 30.8 | 50.0 | 0.38 | 0.24 | 0.38 |
| 182 | 38.7 | 36.4 | 47.1 | 0.32 | 0.30 | 0.38 |
| 183 | 27.3 | 43.9 | 44.5 | 0.24 | 0.38 | 0.38 |
| 184 | 15.9 | 51.3 | 46.4 | 0.14 | 0.45 | 0.41 |
| 185 | 5.7  | 58.6 | 49.3 | 0.05 | 0.52 | 0.43 |
| 186 | 3.4  | 66.1 | 52.2 | 0.03 | 0.54 | 0.43 |
| 187 | 3.4  | 70.9 | 55.1 | 0.03 | 0.55 | 0.42 |
| 188 | 3.4  | 71.0 | 56.2 | 0.02 | 0.55 | 0.43 |
| 189 | 3.4  | 71.0 | 56.2 | 0.03 | 0.54 | 0.43 |
| 190 | 96.6 | 66.1 | 47.9 | 0.46 | 0.31 | 0.23 |
| 191 | 86.5 | 52.4 | 39.5 | 0.48 | 0.29 | 0.23 |
| 192 | 25.8 | 38.6 | 65.9 | 0.20 | 0.30 | 0.51 |
| 193 | 62.1 | 24.6 | 41.5 | 0.48 | 0.19 | 0.32 |
| 194 | 50.0 | 14.1 | 50.0 | 0.44 | 0.12 | 0.44 |
| 195 | 38.0 | 24.6 | 58.5 | 0.31 | 0.20 | 0.48 |
| 196 | 25.8 | 38.6 | 65.9 | 0.20 | 0.30 | 0.51 |
| 197 | 13.6 | 52.4 | 60.6 | 0.11 | 0.41 | 0.48 |
| 198 | 3.4  | 66.1 | 52.1 | 0.03 | 0.54 | 0.43 |
| 199 | 96.6 | 70.9 | 44.9 | 0.46 | 0.33 | 0.21 |
| 200 | 86.5 | 53.2 | 25.3 | 0.52 | 0.32 | 0.16 |
| 201 | 74.2 | 35.1 | 13.0 | 0.60 | 0.29 | 0.11 |
| 202 | 62.1 | 16.9 | 30.2 | 0.57 | 0.15 | 0.28 |
| 203 | 50.0 | 3.8  | 50.0 | 0.48 | 0.04 | 0.48 |
| 204 | 38.0 | 16.9 | 69.9 | 0.30 | 0.14 | 0.56 |
| 205 | 25.8 | 35.1 | 87.0 | 0.17 | 0.24 | 0.59 |
| 206 | 13.6 | 53.2 | 74.7 | 0.10 | 0.38 | 0.52 |
| 207 | 3.4  | 70.9 | 55.1 | 0.03 | 0.55 | 0.42 |
| 208 | 96.6 | 71.0 | 43.8 | 0.46 | 0.34 | 0.20 |
| 209 | 86.5 | 53.2 | 20.0 | 0.54 | 0.33 | 0.13 |
| 210 | 74.2 | 35.0 | 5.4  | 0.65 | 0.31 | 0.04 |
| 211 | 62.1 | 16.8 | 25.9 | 0.59 | 0.16 | 0.25 |
| 212 | 50.0 | 3.7  | 50.0 | 0.48 | 0.04 | 0.48 |
| 213 | 38.0 | 16.8 | 74.1 | 0.30 | 0.13 | 0.57 |
| 214 | 25.8 | 35.0 | 94.6 | 0.16 | 0.23 | 0.61 |

---

---

|     |      |      |      |      |      |      |
|-----|------|------|------|------|------|------|
| 215 | 13.6 | 53.2 | 80.0 | 0.09 | 0.36 | 0.55 |
| 216 | 3.4  | 71.0 | 56.2 | 0.03 | 0.54 | 0.43 |
| 217 | 96.6 | 71.0 | 43.8 | 0.46 | 0.34 | 0.20 |
| 218 | 86.5 | 53.2 | 20.0 | 0.54 | 0.33 | 0.13 |
| 219 | 74.2 | 35.1 | 5.4  | 0.65 | 0.30 | 0.05 |
| 220 | 62.1 | 16.8 | 25.9 | 0.59 | 0.16 | 0.25 |
| 221 | 50.0 | 3.7  | 50.0 | 0.48 | 0.04 | 0.48 |
| 222 | 38.0 | 16.8 | 74.1 | 0.30 | 0.13 | 0.57 |
| 223 | 25.8 | 35.0 | 94.6 | 0.17 | 0.22 | 0.61 |
| 224 | 13.6 | 53.2 | 80.0 | 0.09 | 0.36 | 0.55 |
| 225 | 3.4  | 71.0 | 56.2 | 0.03 | 0.54 | 0.43 |

---



Table S2. The  $\Delta$ OD values of 195 react units after 40 minutes

| NO. | Optical density (OD) |
|-----|----------------------|
| 109 | 0.932                |
| 57  | 0.885                |
| 111 | 0.863                |
| 145 | 0.817                |
| 179 | 0.782                |
| 93  | 0.764                |
| 73  | 0.758                |
| 41  | 0.706                |
| 123 | 0.639                |
| 212 | 0.638                |
| 59  | 0.628                |
| 229 | 0.604                |
| 197 | 0.595                |
| 144 | 0.587                |
| 196 | 0.580                |
| 128 | 0.570                |
| 129 | 0.562                |
| 213 | 0.553                |
| 130 | 0.542                |
| 146 | 0.538                |
| 162 | 0.533                |
| 147 | 0.527                |
| 214 | 0.523                |
| 164 | 0.521                |
| 112 | 0.521                |
| 106 | 0.503                |
| 160 | 0.496                |
| 56  | 0.492                |
| 44  | 0.477                |
| 245 | 0.476                |
| 175 | 0.475                |
| 115 | 0.474                |
| 246 | 0.466                |
| 228 | 0.460                |
| 78  | 0.460                |

---

|     |       |
|-----|-------|
| 127 | 0.458 |
| 124 | 0.457 |
| 95  | 0.444 |
| 142 | 0.443 |
| 165 | 0.442 |
| 180 | 0.441 |
| 157 | 0.439 |
| 60  | 0.429 |
| 182 | 0.427 |
| 211 | 0.426 |
| 89  | 0.424 |
| 122 | 0.420 |
| 159 | 0.415 |
| 79  | 0.413 |
| 43  | 0.405 |
| 198 | 0.401 |
| 161 | 0.392 |
| 61  | 0.391 |
| 227 | 0.383 |
| 22  | 0.379 |
| 39  | 0.378 |
| 40  | 0.373 |
| 199 | 0.372 |
| 195 | 0.362 |
| 113 | 0.359 |
| 163 | 0.357 |
| 158 | 0.356 |
| 42  | 0.354 |
| 156 | 0.353 |
| 96  | 0.352 |
| 278 | 0.348 |
| 72  | 0.347 |
| 149 | 0.346 |
| 139 | 0.346 |
| 45  | 0.343 |
| 133 | 0.343 |
| 166 | 0.338 |
| 177 | 0.337 |

---

---

|     |       |
|-----|-------|
| 132 | 0.335 |
| 215 | 0.334 |
| 62  | 0.328 |
| 262 | 0.325 |
| 176 | 0.324 |
| 231 | 0.324 |
| 230 | 0.322 |
| 264 | 0.321 |
| 232 | 0.317 |
| 194 | 0.315 |
| 131 | 0.313 |
| 279 | 0.311 |
| 105 | 0.311 |
| 280 | 0.309 |
| 114 | 0.309 |
| 247 | 0.309 |
| 181 | 0.308 |
| 263 | 0.308 |
| 178 | 0.307 |
| 193 | 0.307 |
| 184 | 0.306 |
| 23  | 0.306 |
| 121 | 0.303 |
| 140 | 0.303 |
| 233 | 0.300 |
| 281 | 0.300 |
| 141 | 0.297 |
| 167 | 0.296 |
| 27  | 0.292 |
| 248 | 0.290 |
| 24  | 0.289 |
| 192 | 0.283 |
| 174 | 0.283 |
| 26  | 0.282 |
| 261 | 0.266 |
| 183 | 0.263 |
| 80  | 0.263 |
| 28  | 0.261 |

---

---

|     |       |
|-----|-------|
| 200 | 0.257 |
| 25  | 0.253 |
| 250 | 0.251 |
| 210 | 0.249 |
| 173 | 0.241 |
| 88  | 0.239 |
| 218 | 0.235 |
| 219 | 0.230 |
| 209 | 0.229 |
| 265 | 0.226 |
| 217 | 0.226 |
| 268 | 0.226 |
| 249 | 0.225 |
| 97  | 0.225 |
| 9   | 0.224 |
| 201 | 0.222 |
| 6   | 0.222 |
| 98  | 0.221 |
| 234 | 0.221 |
| 282 | 0.220 |
| 46  | 0.219 |
| 277 | 0.218 |
| 99  | 0.216 |
| 216 | 0.215 |
| 202 | 0.214 |
| 11  | 0.213 |
| 150 | 0.205 |
| 220 | 0.204 |
| 134 | 0.204 |
| 191 | 0.200 |
| 138 | 0.200 |
| 260 | 0.198 |
| 251 | 0.198 |
| 244 | 0.197 |
| 100 | 0.196 |
| 63  | 0.195 |
| 168 | 0.193 |
| 243 | 0.193 |

---

---

|     |       |
|-----|-------|
| 117 | 0.192 |
| 7   | 0.192 |
| 81  | 0.191 |
| 116 | 0.186 |
| 5   | 0.184 |
| 284 | 0.182 |
| 71  | 0.182 |
| 285 | 0.177 |
| 10  | 0.176 |
| 226 | 0.175 |
| 8   | 0.174 |
| 185 | 0.173 |
| 267 | 0.173 |
| 221 | 0.172 |
| 152 | 0.172 |
| 283 | 0.172 |
| 29  | 0.171 |
| 266 | 0.171 |
| 151 | 0.169 |
| 204 | 0.165 |
| 203 | 0.161 |
| 172 | 0.160 |
| 64  | 0.158 |
| 137 | 0.156 |
| 190 | 0.155 |
| 82  | 0.154 |
| 169 | 0.151 |
| 87  | 0.150 |
| 208 | 0.147 |
| 155 | 0.146 |
| 104 | 0.136 |
| 120 | 0.130 |
| 189 | 0.127 |
| 12  | 0.125 |
| 186 | 0.125 |
| 47  | 0.123 |
| 70  | 0.122 |
| 207 | 0.122 |

---

---

|     |       |
|-----|-------|
| 83  | 0.121 |
| 135 | 0.121 |
| 30  | 0.117 |
| 103 | 0.112 |
| 171 | 0.109 |
| 187 | 0.108 |
| 154 | 0.105 |
| 153 | 0.105 |

---
